# Supplementary material for: Preparation and Properties of Mechanically Robust, Colorless, and Transparent Aramid Films
Source: MDPI journal article supplement (doi:10.3390/polym16050575), 2024-02-20
Supplement: s1 [file s1]

## Supplementary Material

# Preparation and Properties of Mechanically Robust, Colorless, and Transparent Aramid Films

Heesang Kim <sup>1</sup>, Jin-Hee Noh <sup>1,2</sup>, Young-Rae Kim <sup>1</sup>, Hyojin Kim <sup>2,\*</sup> and Giseop Kwak <sup>1,\*</sup>

<sup>1</sup> Polymeric Nanomaterials Laboratory, Department of Polymer Science & Engineering, Kyungpook National University, 1370 Sankyuk-Dong, Buk-Ku, Daegu 41566, Republic of Korea; wsk1025@naver.com (H.K.); jhnoh@dgtp.or.kr (J.-H.N.); xornjs147@naver.com (Y.-R.K.)

<sup>2</sup> Advanced Materials & Components Center, Industry Innovation Division, Daegu Technopark, 46-17 Seongseogongdan-ro, Dalseo-gu, Daegu 42716, Republic of Korea

\* Correspondence: hjkim@dgtp.or.kr (H.K.); gkwak@knu.ac.kr (G.K.)

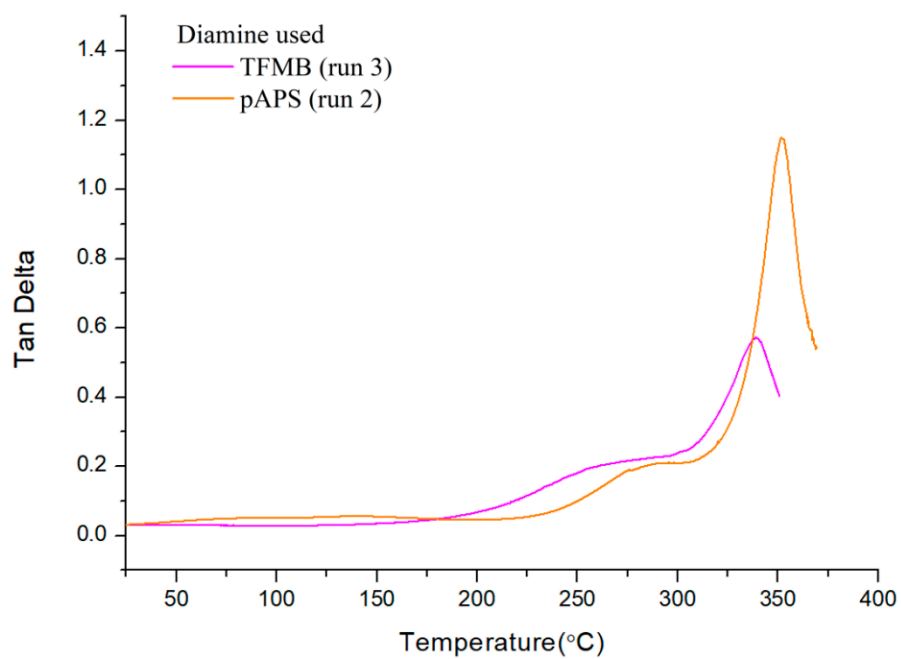

**Figure S1.** DTMA curves of aramids prepared from diamines of TFMB and pAPS (under N<sub>2</sub> flow, a heating rate of 5°C/min).

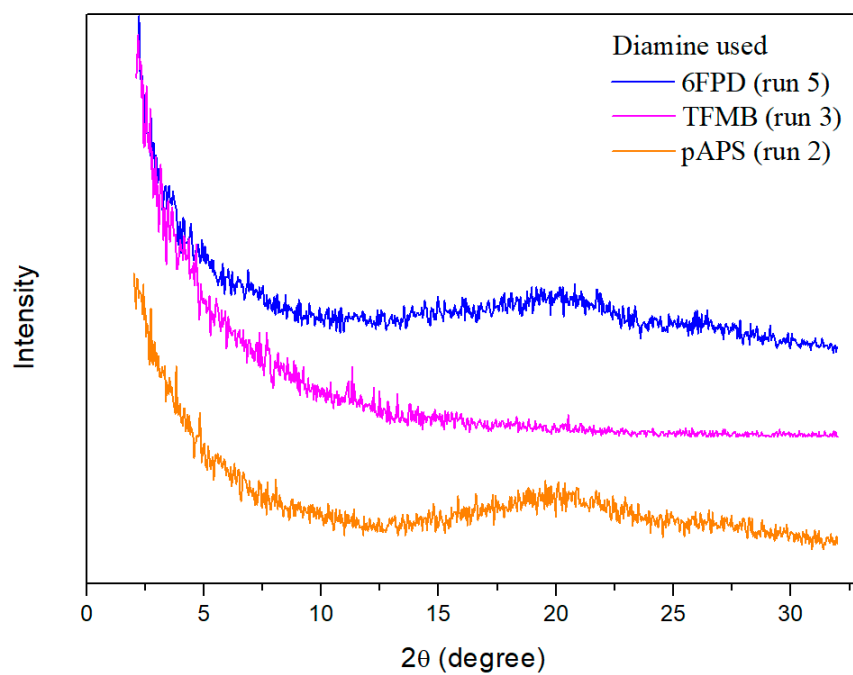

**Figure S2.** XRD patterns of aramids prepared from diamines of 6FPD, TFMB and pAPS.
